# Supplementary material
Source: MDPI journal article supplement (https://www.mdpi.com/1424-2818/15/6/792)
Supplement: s1 [file s1]

Archive with 5 entries (5 files):
- Supplemental Tables 3-8.pdf
- SupplementalFigureS1.jpg
- SupplementalFigureS1_Caption.pdf
- Supplemental_Table_1.pdf
- Supplemental_Table_2.pdf
