# Supplementary material
Source: MDPI journal article supplement (https://www.mdpi.com/1424-2818/15/6/792)

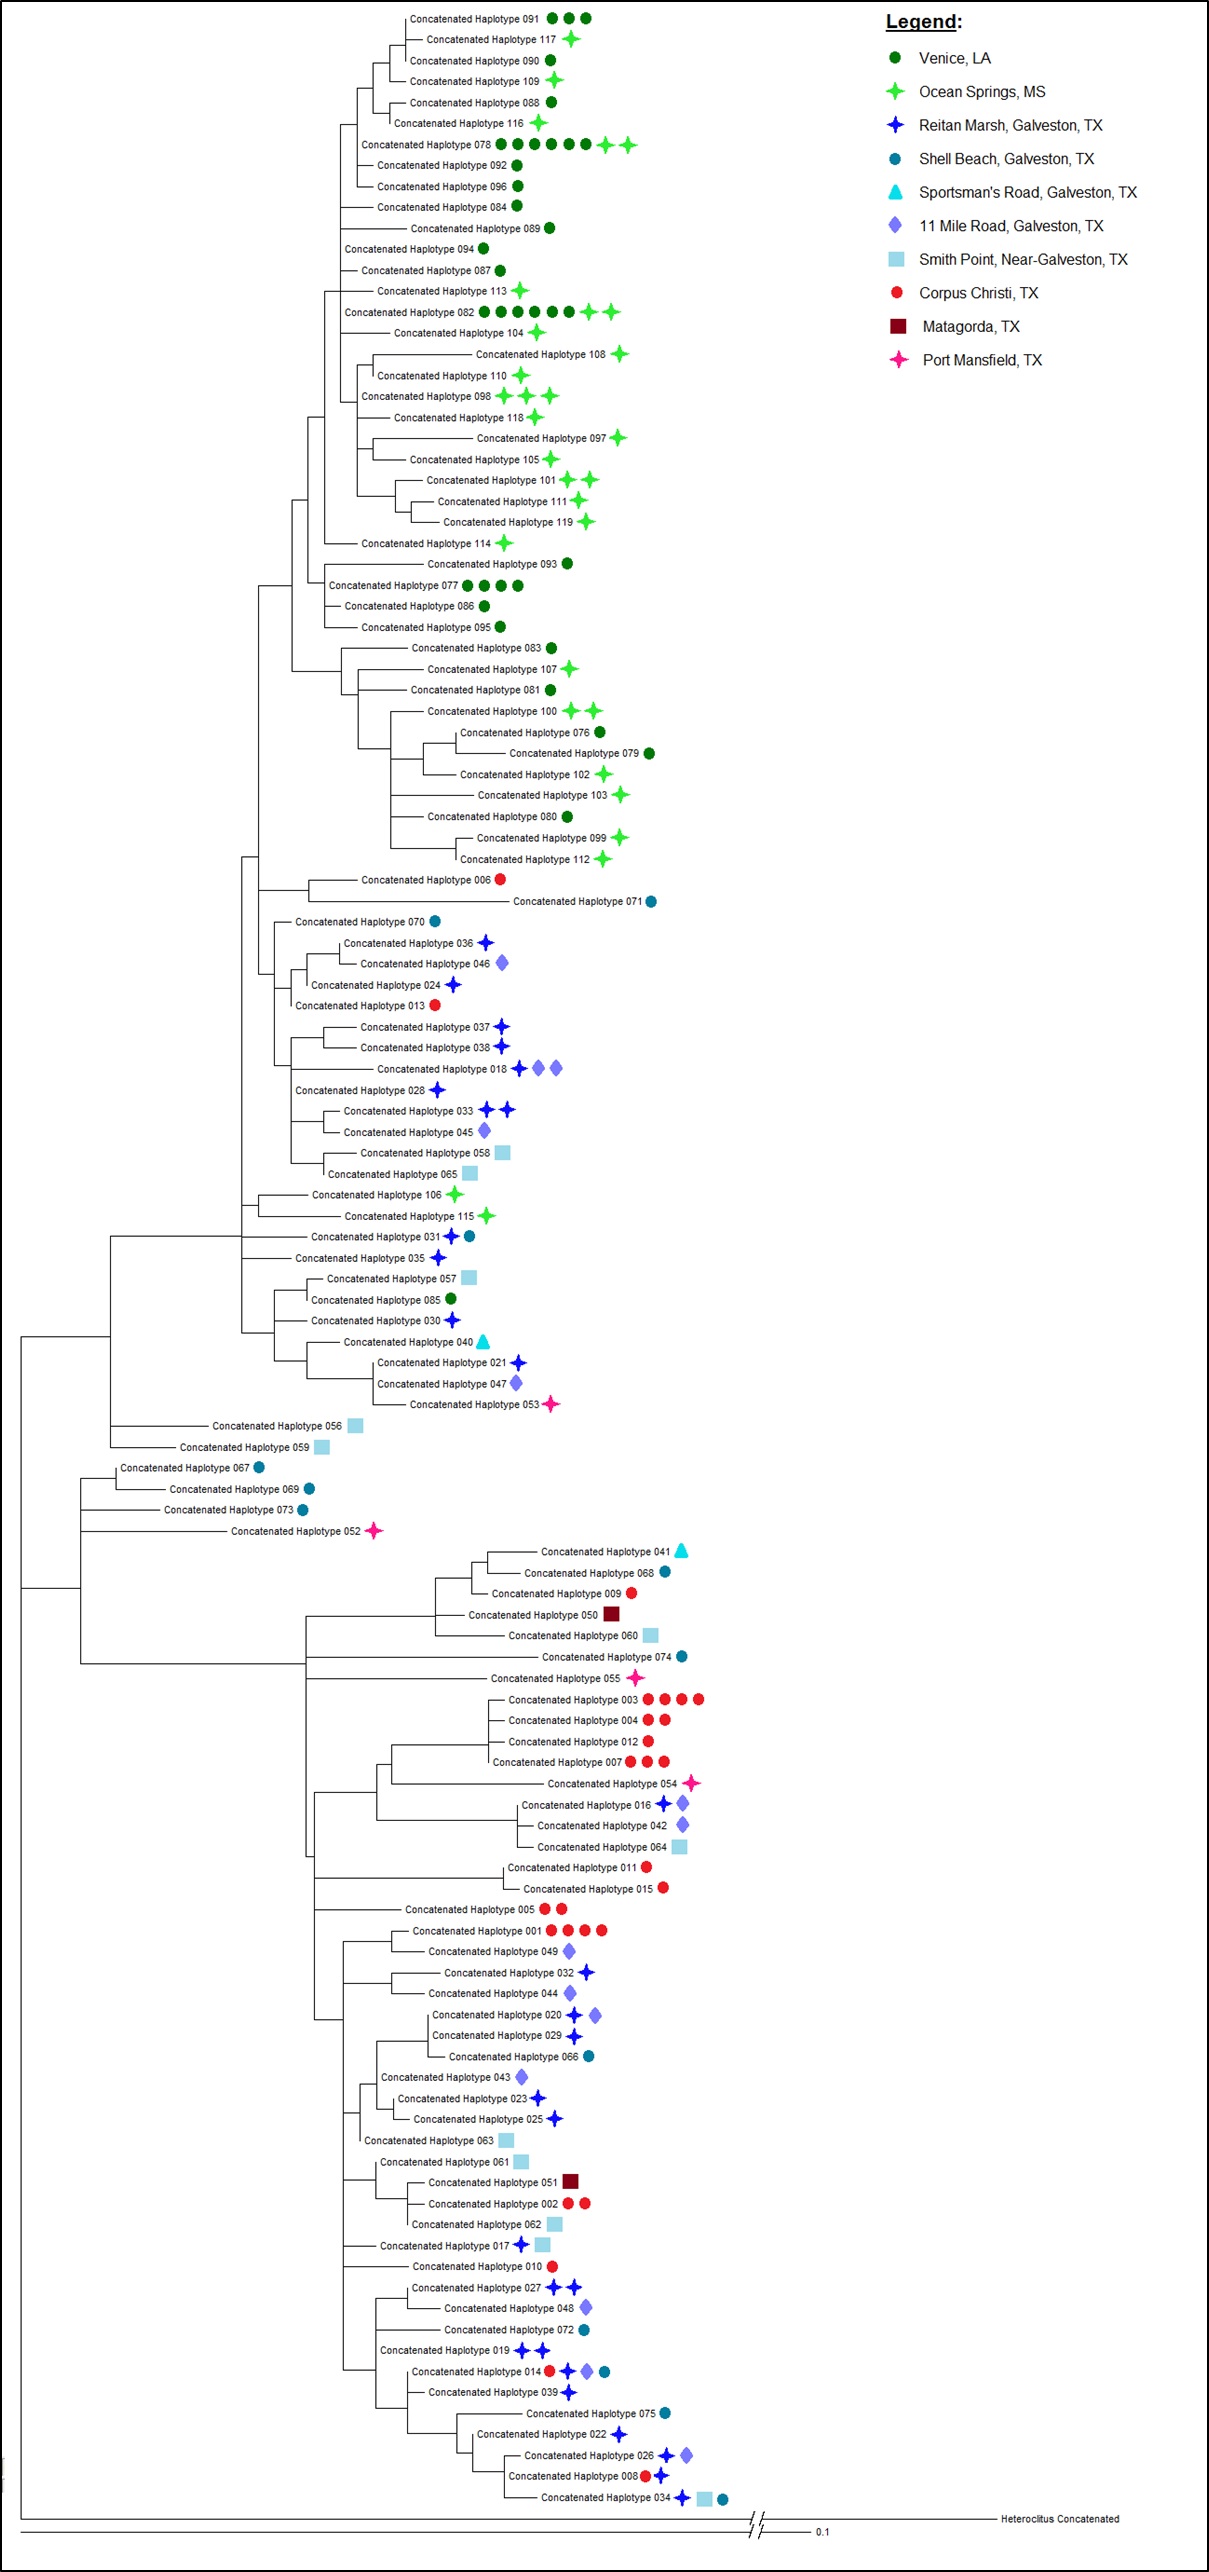

Supplement: s1 [file s1 › SupplementalFigureS1.jpg]
